# Supplementary figures and images for: Stereomutations in silicate oligomerization: the role of steric hindrance and intramolecular hydrogen bonding
Source: Royal Society of Chemistry journal article supplement (doi:10.1039/d4cp00036f), 2024-01-01

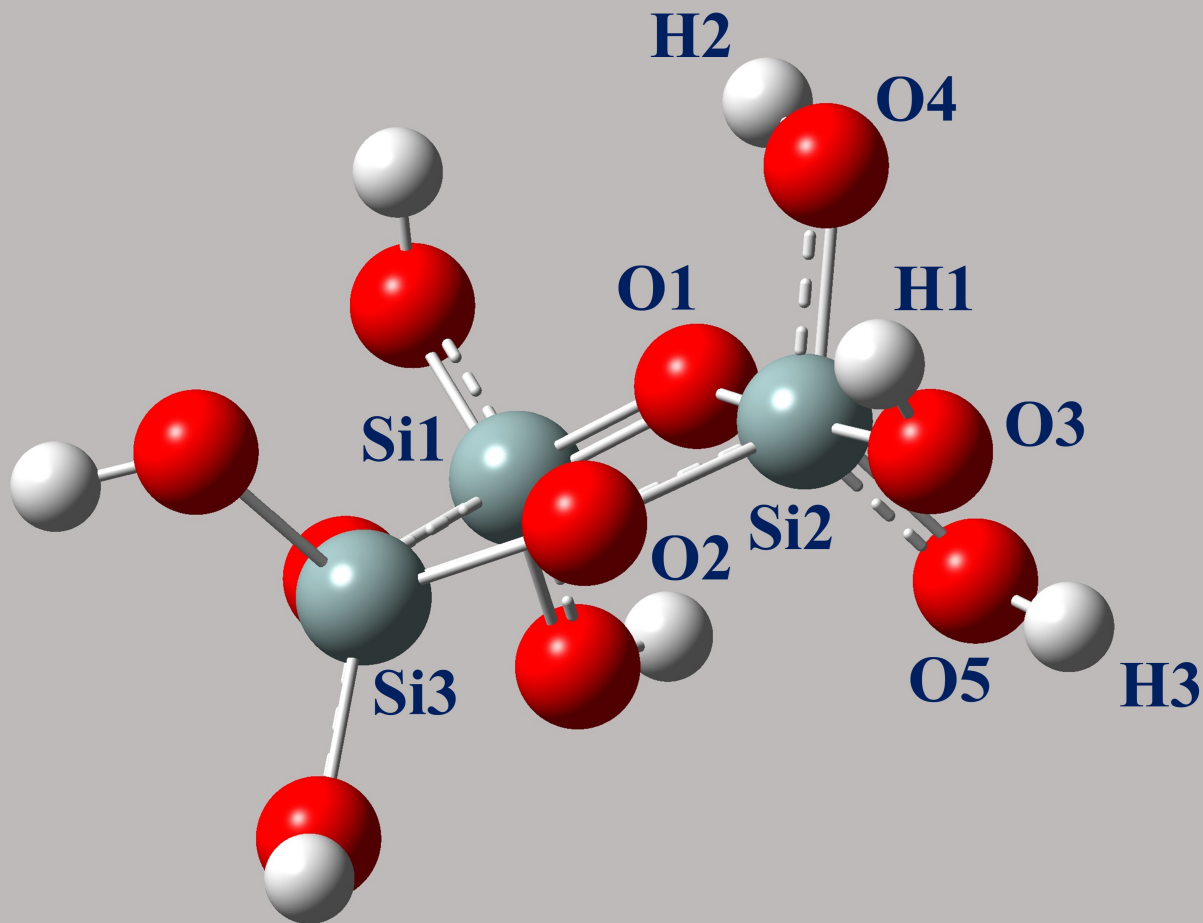

Supplement: d4cp00036f1.pdf [file d4cp00036f1.pdf]

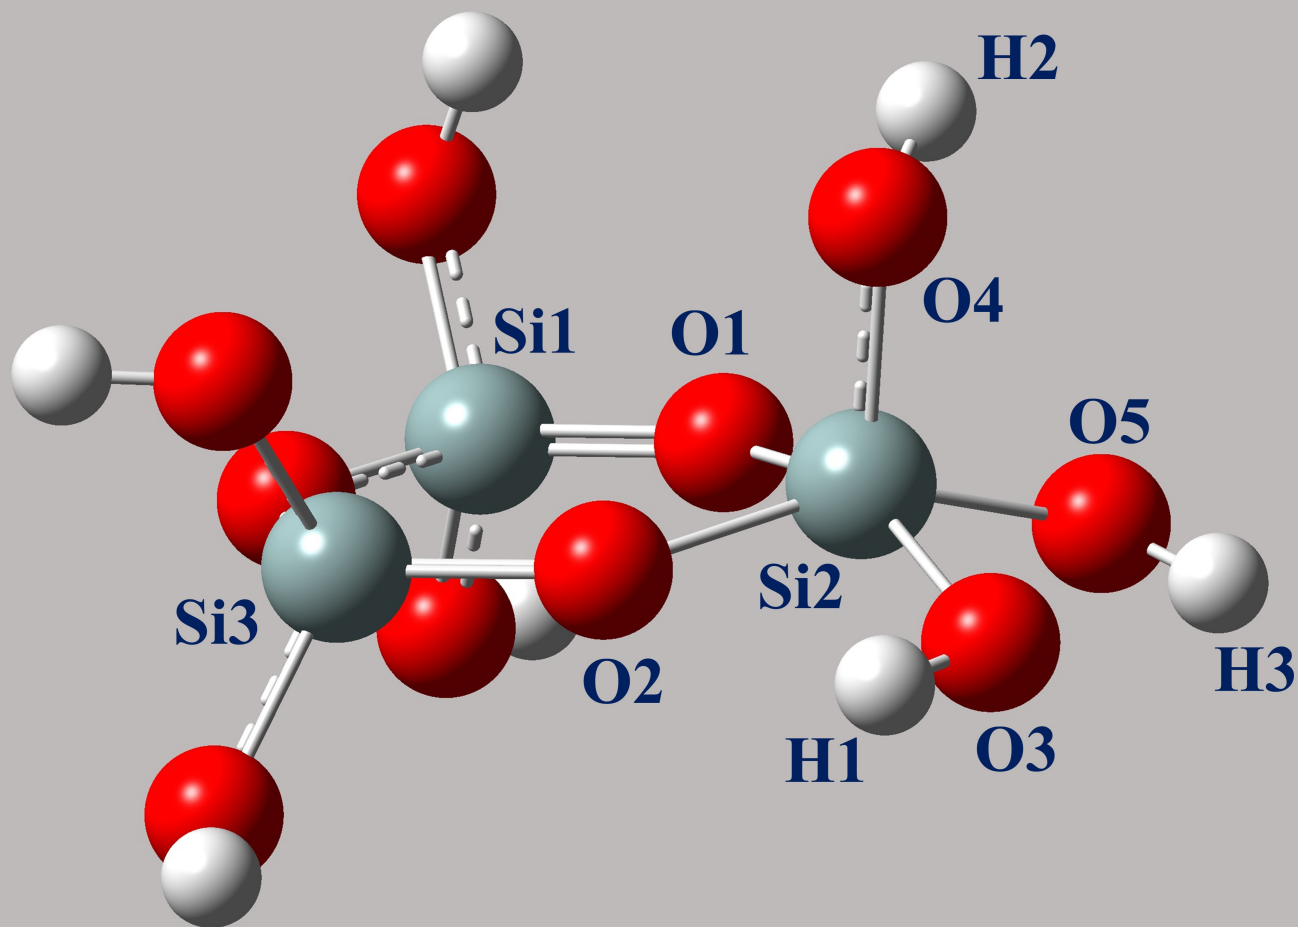

Supplement: d4cp00036f2.pdf [file d4cp00036f2.pdf]

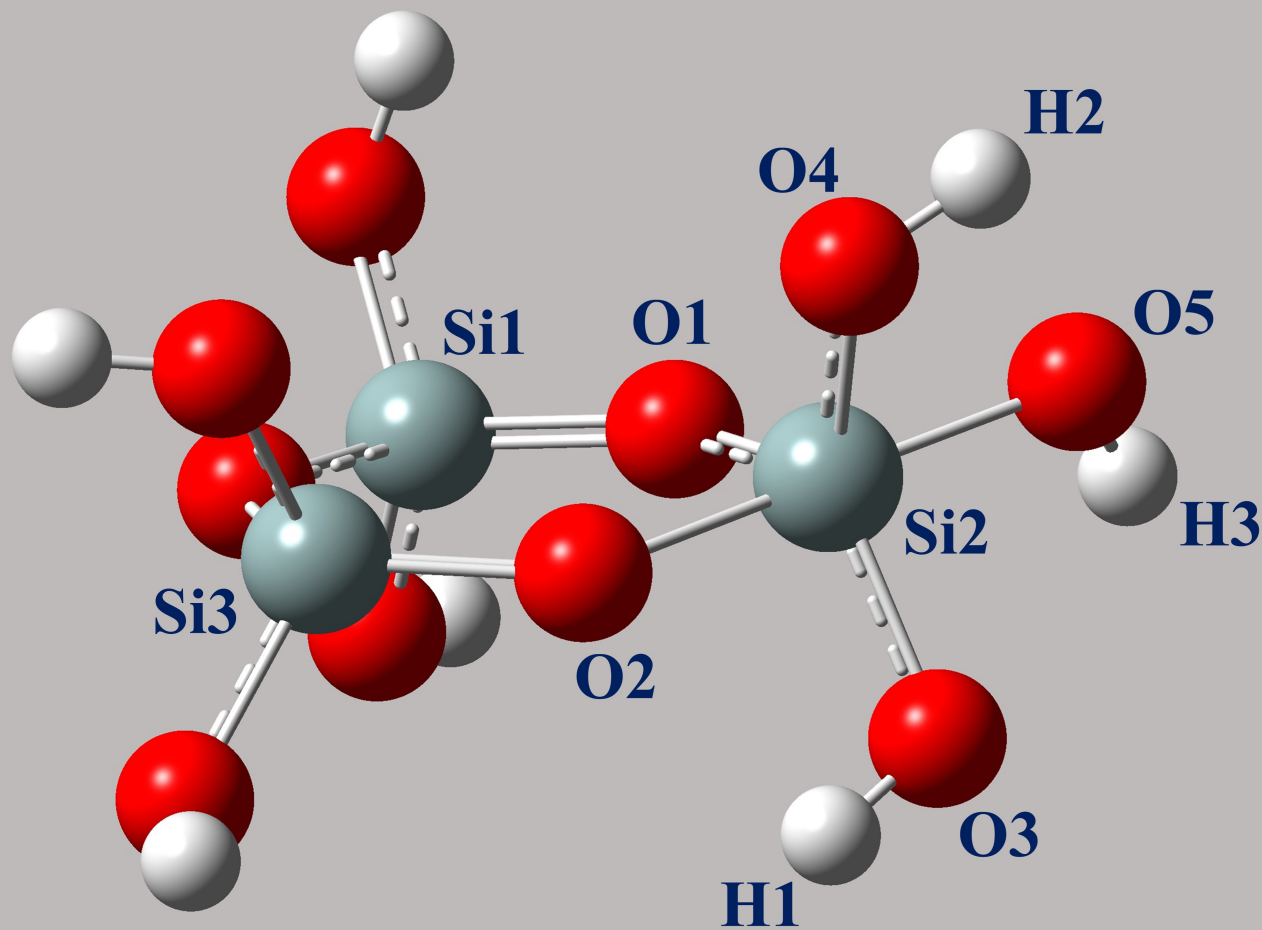

Supplement: d4cp00036f3.pdf [file d4cp00036f3.pdf]

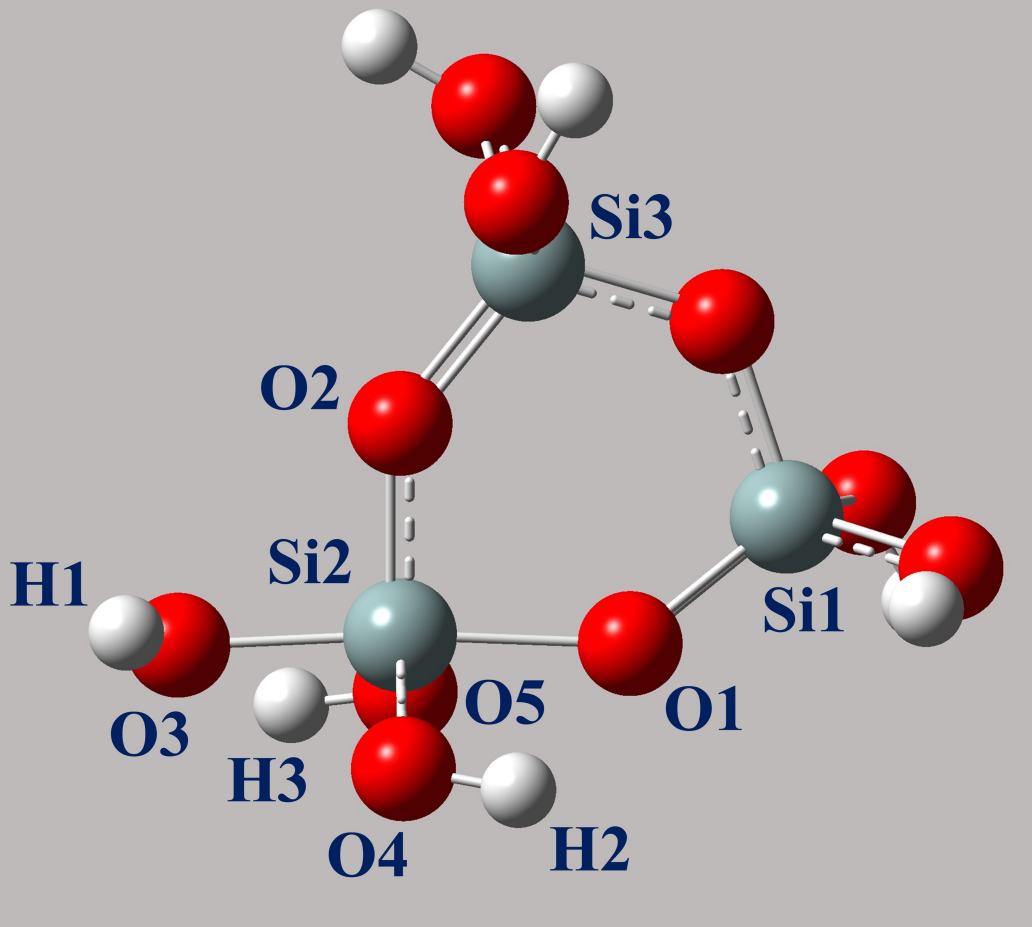

Supplement: d4cp00036f4.pdf [file d4cp00036f4.pdf]

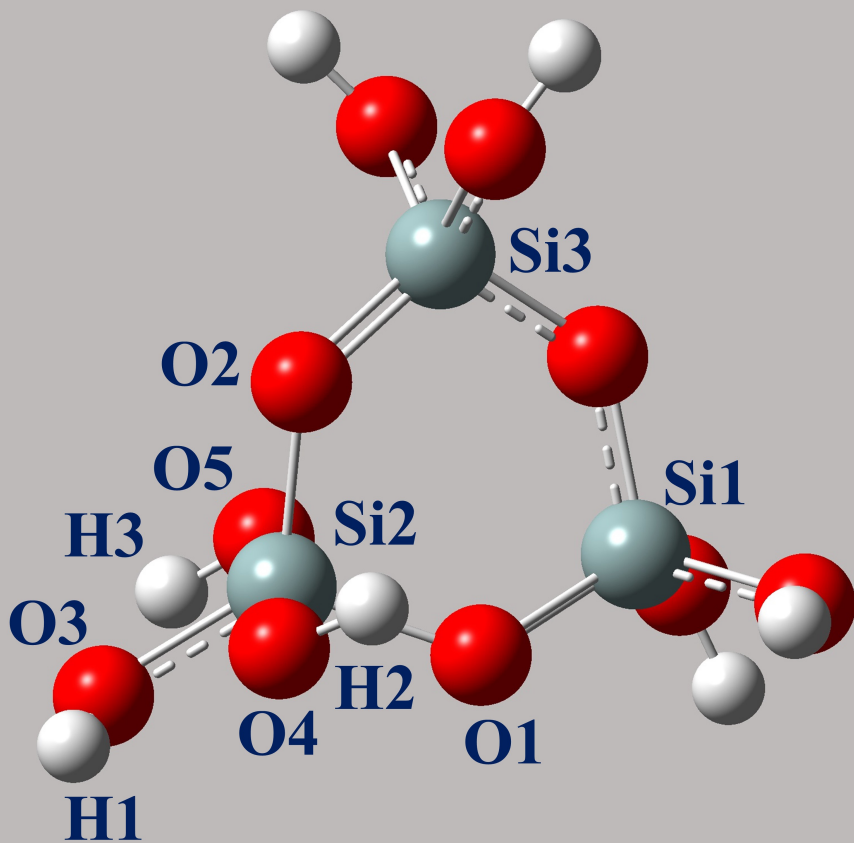

Supplement: d4cp00036f5.pdf [file d4cp00036f5.pdf]
